# Supplementary material
Source: PubMed Central journal article supplement (PMC7963583)
Supplement: 17-00330.pdf [file 17-00330.pdf]

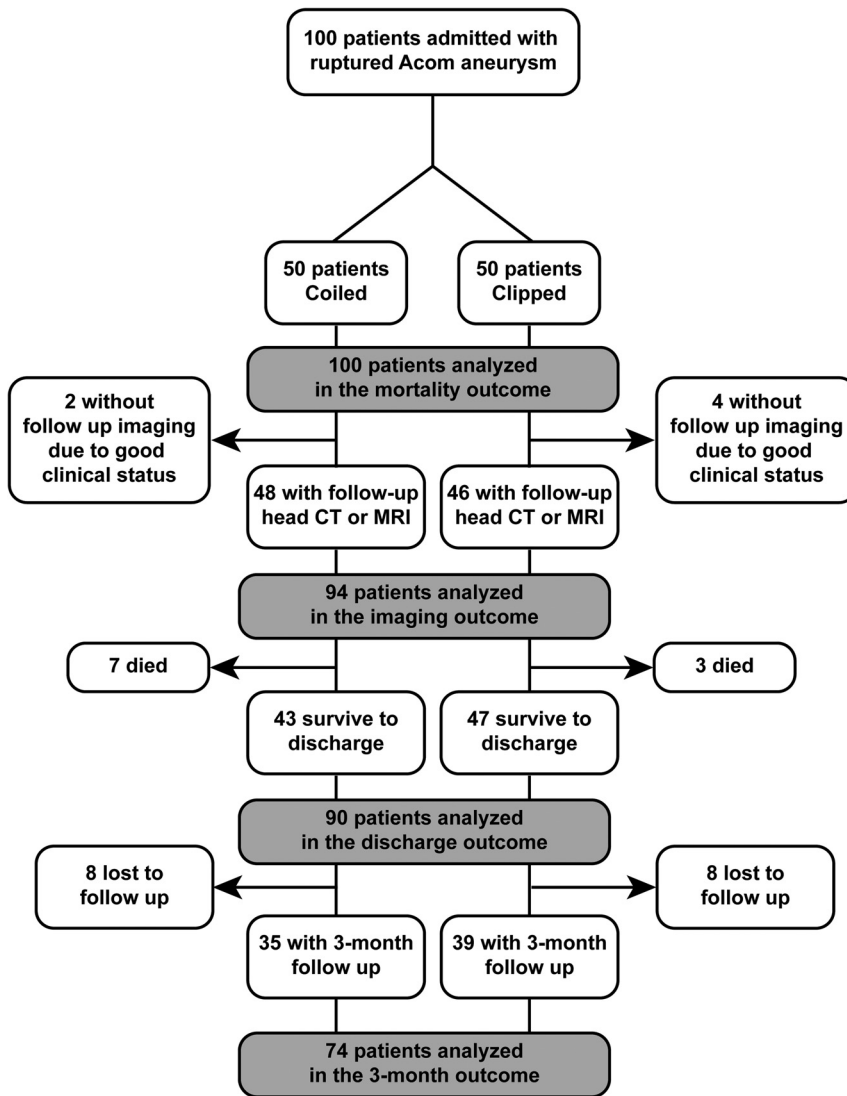

ON-LINE FIG 1. Flow diagram of patients in the study.

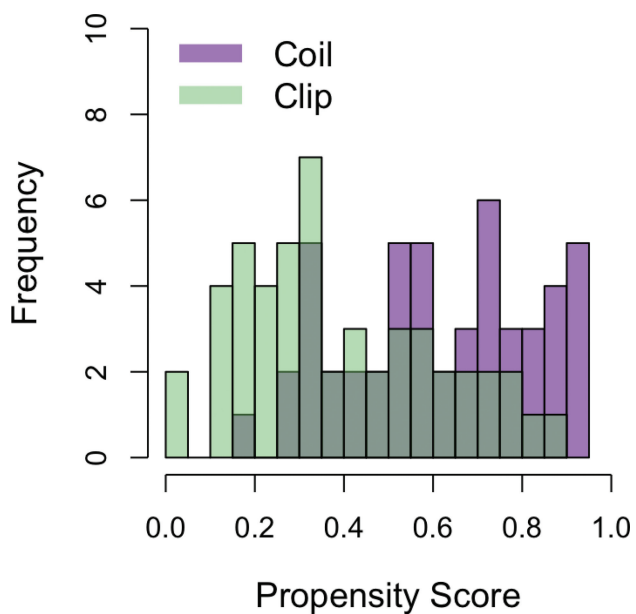

ON-LINE FIG 2. Histogram of propensity scores.

**On-line Table: Sensitivity analyses results for infarction**

|                                                                          | OR (95% CI)      | P Value |
|--------------------------------------------------------------------------|------------------|---------|
| A. Assumes patients with no follow-up imaging did not have an infarction |                  |         |
| Frontal lobe IPH after treatment                                         | 3.1 (1.0–10.7)   | .05     |
| Non-vasospasm ischemic frontal lobe infarction                           | 9.0 (2.0–66.2)   | .004    |
| Artery of Heubner infarction after treatment                             | 22.2 (3.7–431.2) | <.001   |
| Embolic infarction after treatment                                       | 0.3 (0.1–1.1)    | .08     |
| Vasospasm-related ischemic infarction                                    | 0.9 (0.3–3.2)    | .90     |
| Any ischemic infarction after treatment                                  | 4.3 (1.6–12.5)   | .004    |
| B. Assumes patients with no follow-up imaging had an infarction          |                  |         |
| Frontal lobe IPH after treatment                                         | 2.2 (0.8–6.2)    | .13     |
| Non-vasospasm ischemic frontal lobe infarction                           | 3.9 (1.2–16.1)   | .03     |
| Artery of Heubner infarction after treatment                             | 6.5 (1.8–31.6)   | .003    |
| Embolic infarction after treatment                                       | 0.4 (0.1–1.1)    | .07     |
| Vasospasm-related ischemic infarction                                    | 0.8 (0.3–2.4)    | .67     |
| Any ischemic infarction after treatment                                  | 3.7 (1.4–10.7)   | .007    |

**Note:**—IPH indicates intraparenchymal hemorrhage.
